# Supplementary material for: Effect of the phase-separated structure on CO2 separation performance of the poly(amidoamine) dendrimer immobilized in a poly(ethylene glycol) network
Source: Royal Society of Chemistry journal article supplement (doi:10.1039/c3ta13711b), 2013-01-01
Supplement: c3ta13711b.pdf [file c3ta13711b.pdf]

Electronic Supplementary Information

**Effect of phase-separated structure on CO<sub>2</sub> separation performance of poly(amidoamine) dendrimer immobilized in a poly(ethylene glycol) network**

Ikuo Taniguchi,\* Shuhong Duan, Teruhiko Kai,\* Shingo Kazama, and Hiroshi Jinnai

\*To whom correspondence should be addressed: [ikuot@i2cner.kyushu-u.ac.jp](mailto:ikuot@i2cner.kyushu-u.ac.jp)

### $^1\text{H}$ NMR spectra of PEGDMAs.

Fig. S1 shows  $^1\text{H}$  NMR spectra of purified PEG<sub>1k</sub>DMA (EG unit: 23) and PEG<sub>2k</sub>DMA (EG unit: 45). A triplet peak at 4.30 ppm (signal c) corresponds to methylene protons next to ester oxygen, indicating progress of the reaction.

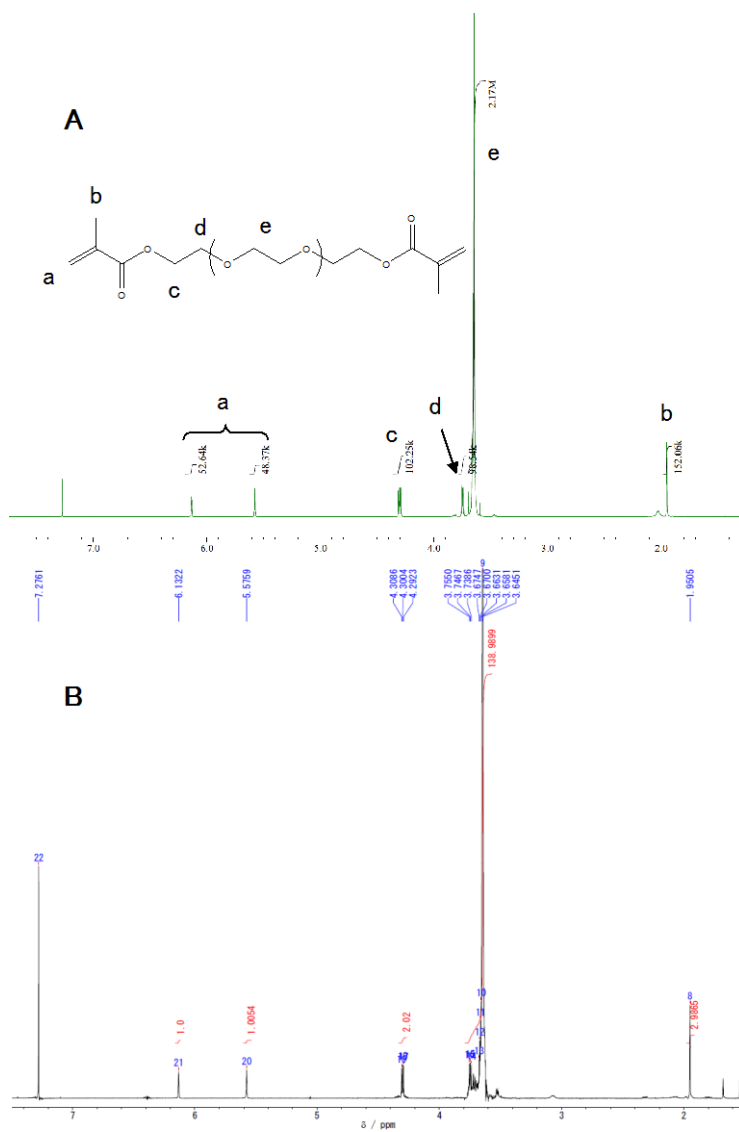

**Fig. S1**  $^1\text{H}$  NMR spectra of (A) PEG<sub>1k</sub>DMA and (B) purified PEG<sub>2k</sub>DMA in  $\text{CDCl}_3$  at 298 K.  $\text{Me}_4\text{Si}$  as an internal standard.

### Determination of average PAMAM dendrimer domain size.

The processed 2D images at each depth are summed, and the summed image was Fourier transformed to give a plot of  $q_m^2 \cdot I(q_m)$  as a function of  $q_m$  as represented in Fig. S2. In this case, a sharp peak ( $q_m = 3.11 \mu\text{m}^{-1}$ ) was found, which corresponded to a length of periodic structure  $\lambda_m (= 2.02 \mu\text{m}$  by Eq. 4).

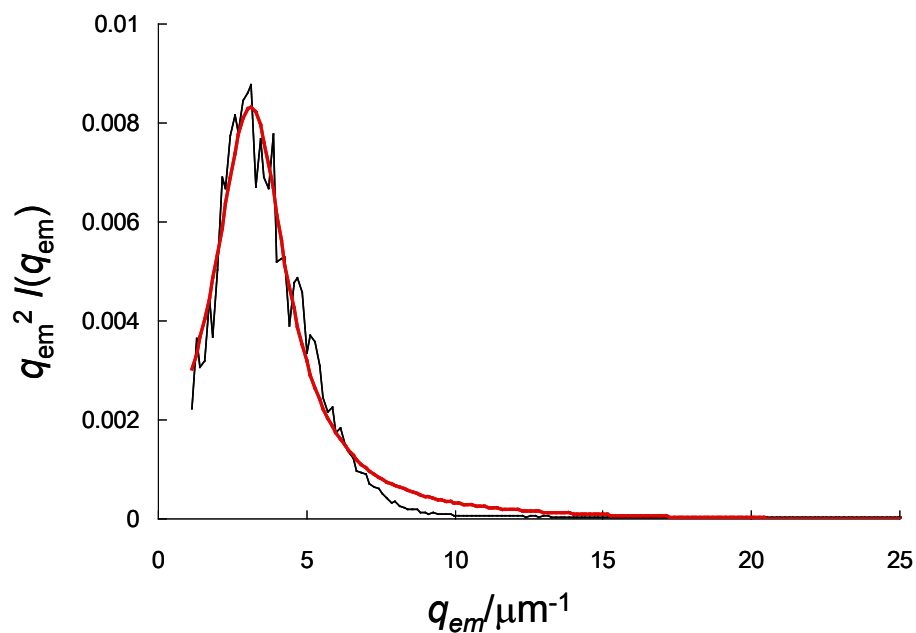

**Fig. S2** A Kratky plot of the magnitude of the Fourier transformation as a function of the wavenumber and the Lorentzian fitting. The polymeric membrane contained PAMAM dendrimer with 50 wt% in crosslinked PEGDMA (EG unit: 14).
