# Supplementary material for: Effect of the phase-separated structure on CO2 separation performance of the poly(amidoamine) dendrimer immobilized in a poly(ethylene glycol) network
Source: Royal Society of Chemistry journal article supplement (doi:10.1039/c3ta13711b), 2013-01-01
Supplement: c3ta13711b_2.pdf [file c3ta13711b_2.pdf]

Electronic Supplementary Material

**Effect of phase-separated structure on CO<sub>2</sub> separation performance of poly(amidoamine) dendrimer immobilized in a poly(ethylene glycol) network**

Ikuo Taniguchi,\* Shuhong Duan, Teruhiko Kai,\* Shingo Kazama, and Hiroshi Jinnai

\*To whom correspondence should be addressed: [ikuot@i2cner.kyushu-u.ac.jp](mailto:ikuot@i2cner.kyushu-u.ac.jp)

**File name of the video:** bicontinuous structure.mov

**Short descriptive title:** 3D reconstructed structure of PAMAM dendrimer containing polymeric membrane (PEG-rich phase)

**Video legend:** Formation of a bicontinuous structure upon polymerization-induced phase separation between PAMAM dendrimer and PEG matrix. PEG-rich phase was colored while PAMAM dendrimer-rich phase left empty.

**Keywords:** 3D structure, phase separation, polymeric blend, CO<sub>2</sub> separation, membrane, PAMAM dendrimer, PEG
